# Supplementary material
Source: publisher figshare collection journal article supplement (https://acs.figshare.com/ndownloader/files/10711174)
Supplement: Supplementary file 1 [file 10711174]

## Supporting Information

### Spectroscopic investigation of the electrosynthesis of diphenyl carbonate from CO and phenol on gold electrodes

Marta C. Figueiredo<sup>a\*</sup>, Vinh Trieu<sup>b</sup>, Stefanie Eiden<sup>b</sup>, Jan Heijl<sup>c</sup>, Marc T. M. Koper<sup>a\*</sup>

<sup>a</sup>Leiden Institute of Chemistry, Leiden University, P.O. Box 9502, 2300 RA Leiden, The Netherlands, Email: m.koper@lic.leidenuniv.nl

<sup>b</sup>Covestro Deutschland AG, 51365 Leverkusen, Germany

<sup>c</sup>Covestro NV, 2040 Antwerp, Belgium

#### Corresponding Author

\* Marc T. M. Koper  
m.koper@lic.leidenuniv.nl

#### 1. Experimental details:

The experiments were performed using a spectroelectrochemical cell with a three electrode configuration as described elsewhere<sup>8,9</sup>. An Au disc was used as working electrode. Before each experiment the Au disc was mechanically polished with alumina suspension, rinsed with MilliQ water (18.4 MΩ.cm), sonicated for 5 min and finally flame annealed. A Pt coil was used as counter electrode and an Ag/AgCl electrode as reference. The electrode potential was controlled with a Potentiostat 466 System (Model ER466) from E-DAQ. All the experiments were performed at room temperature.

The electrolyte solution was prepared with 0.1 M LiClO<sub>4</sub> (Fluka, <99%) in methanol (MeOH, 98% anhydrous from Sigma Aldrich) to which phenol (PhOH, ACS reagent, ≥99.0% from Sigma) was added when appropriate. Some experiments were performed in a different solvent, acetonitrile 98% anhydrous from Sigma Aldrich (MeCN). Prior to the experiments the solutions were purged with Ar

(6.0 from Linde) to remove all the oxygen, and blank spectra were obtained. For the experiments with CO, the solutions was purged with CO (6.0 Linde) during 20 min after oxygen removal. During the spectroelectrochemical measurements, the gas flow was kept in the cell atmosphere.

For the in situ Fourier Transform Infra-Red (FTIR) Spectroscopy experiments, a Bruker Vertex 80 V IR spectrophotometer was used. The experiments were performed in external configuration using a  $\text{CaF}_2$  prism bevelled at  $60^\circ$  and the electrode was pressed against the prismatic window at a controlled potential in a thin layer configuration (Figure S1) . The presented spectra correspond to an average of 100 interferograms with  $8\text{ cm}^{-1}$  resolution and *p*-polarized light. The spectra in this work are presented as absorbance, according to  $A = -\log(R/R_0)$  where  $R$  and  $R_0$  are the reflectance corresponding to the single beam spectra obtained at the sample and reference potentials, respectively. As a consequence, positive bands correspond to species which concentration increases from reference to the sample potential and negative bands to species that decrease in concentrations from reference to sample potential.

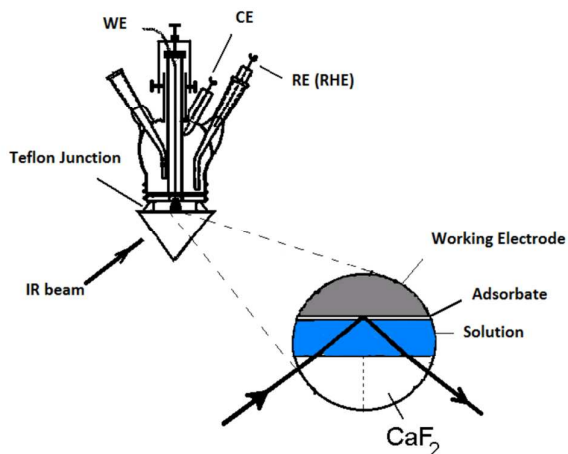

Figure S1: Scheme of the spectroelectrochemical cell used in this work.

## 2. Transmission spectra of 0.1 M PhOH in 0.1M $\text{LiClO}_4$ in MeOH

The transmission spectrum for PhOH in a MeOH solution presents 4 vibrational features at 1598, 1505, 1473,  $1358\text{ cm}^{-1}$ . See Figure S2.

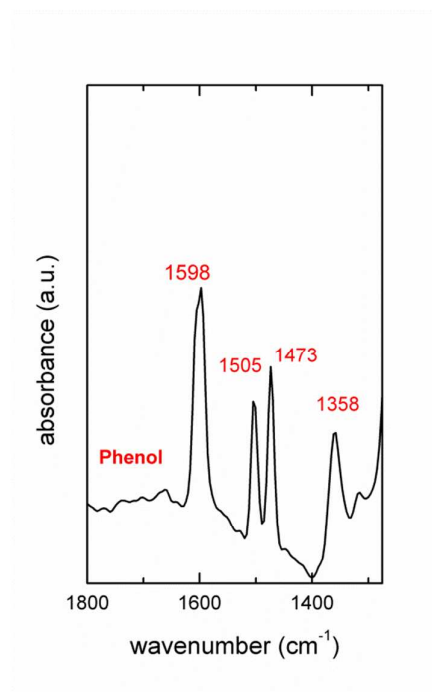

**Figure S2: Transmission spectra of 0.1 M PhOH in 0.1M LiClO<sub>4</sub> in MeOH**
